# Supplementary material for: Type 2 diabetes mellitus accelerates brain aging and cognitive decline: Complementary findings from UK Biobank and meta-analyses
Source: eLife journal article supplement (doi:10.7554/elife.73138), 2022-04-28

# Domain Specific Cognitive Deficits Associated with Age and T2DM Quantified Separately for Sexes, UK Biobank

**A**

Age: UK Biobank Dataset (HC only)

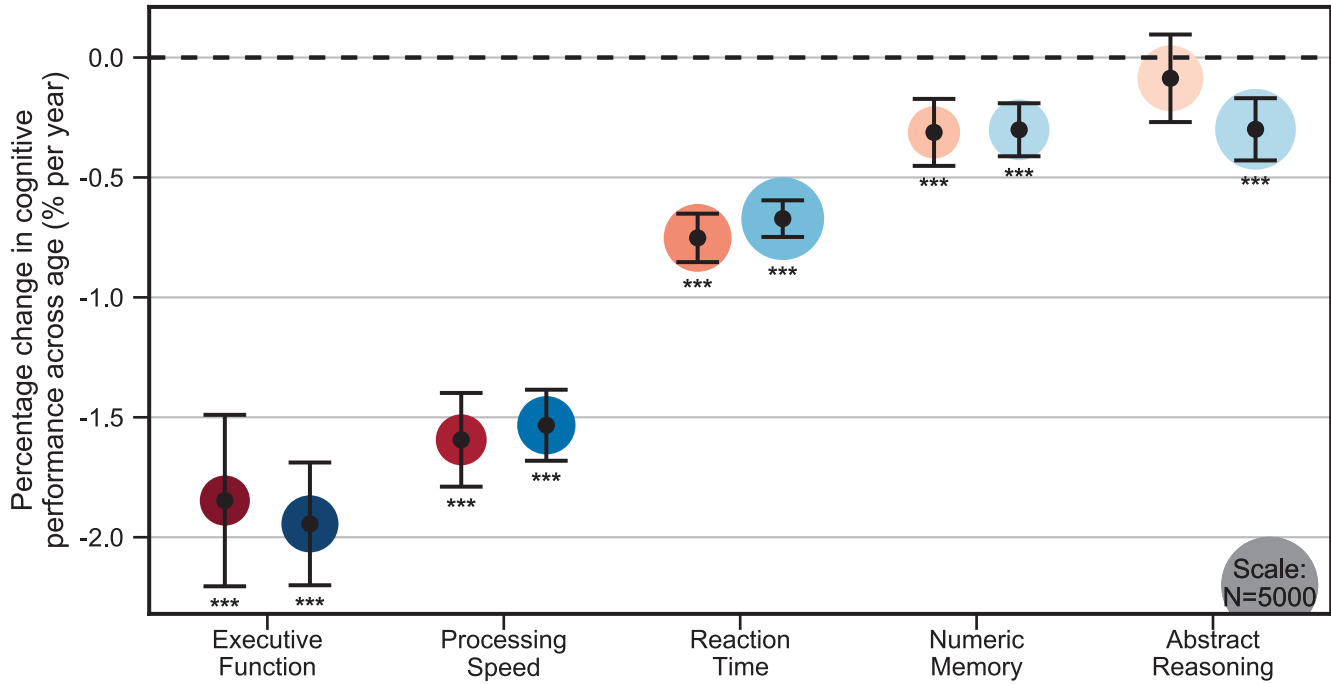

**B**

T2DM: UK Biobank Dataset (T2DM+ vs. HC)

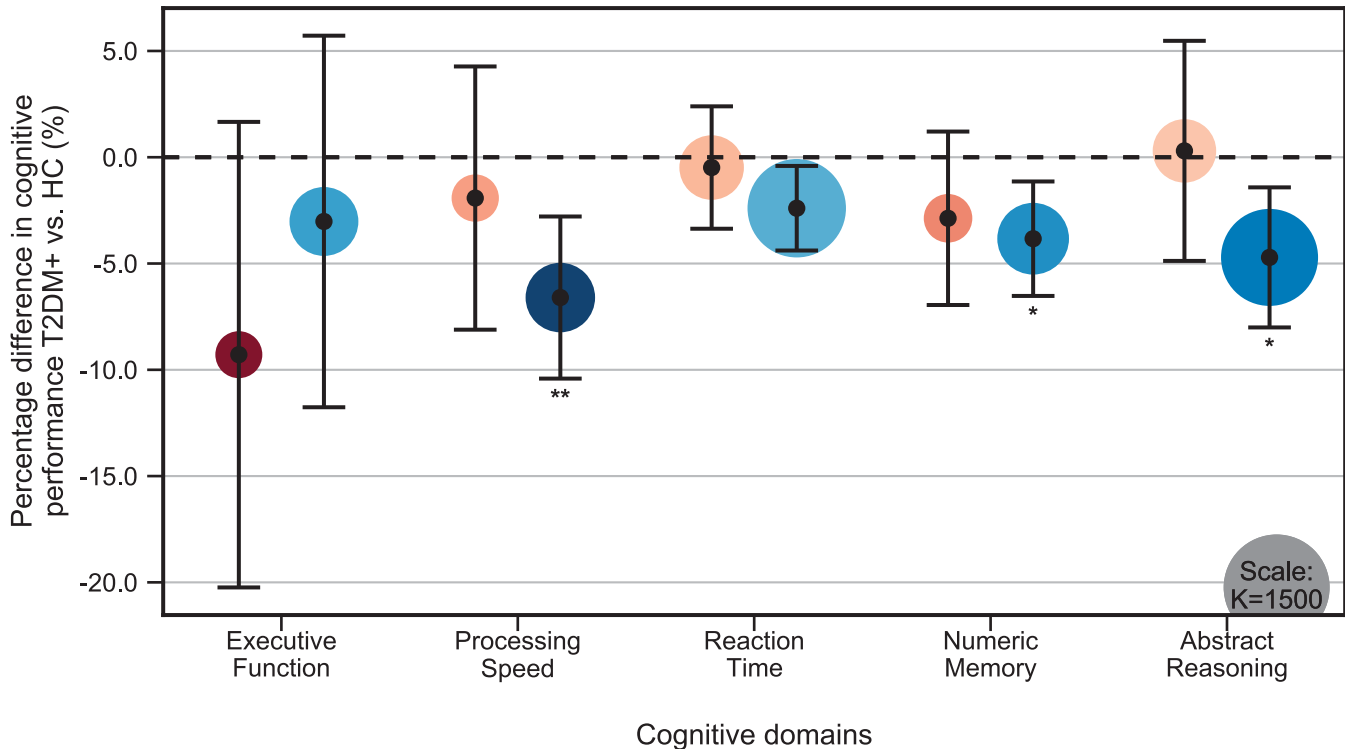

Supplement: supp [file elife-73138-supp-v1.zip]
