# Supplementary material for: Type 2 diabetes mellitus accelerates brain aging and cognitive decline: Complementary findings from UK Biobank and meta-analyses
Source: eLife journal article supplement (doi:10.7554/elife.73138), 2022-04-28

# Region Specific Gray Matter Volume

## Medicated (T2DM+, metformin only) vs. Unmedicated (T2DM+)

$N_{metf+}=168$ ,  $N_{metf-}=168$

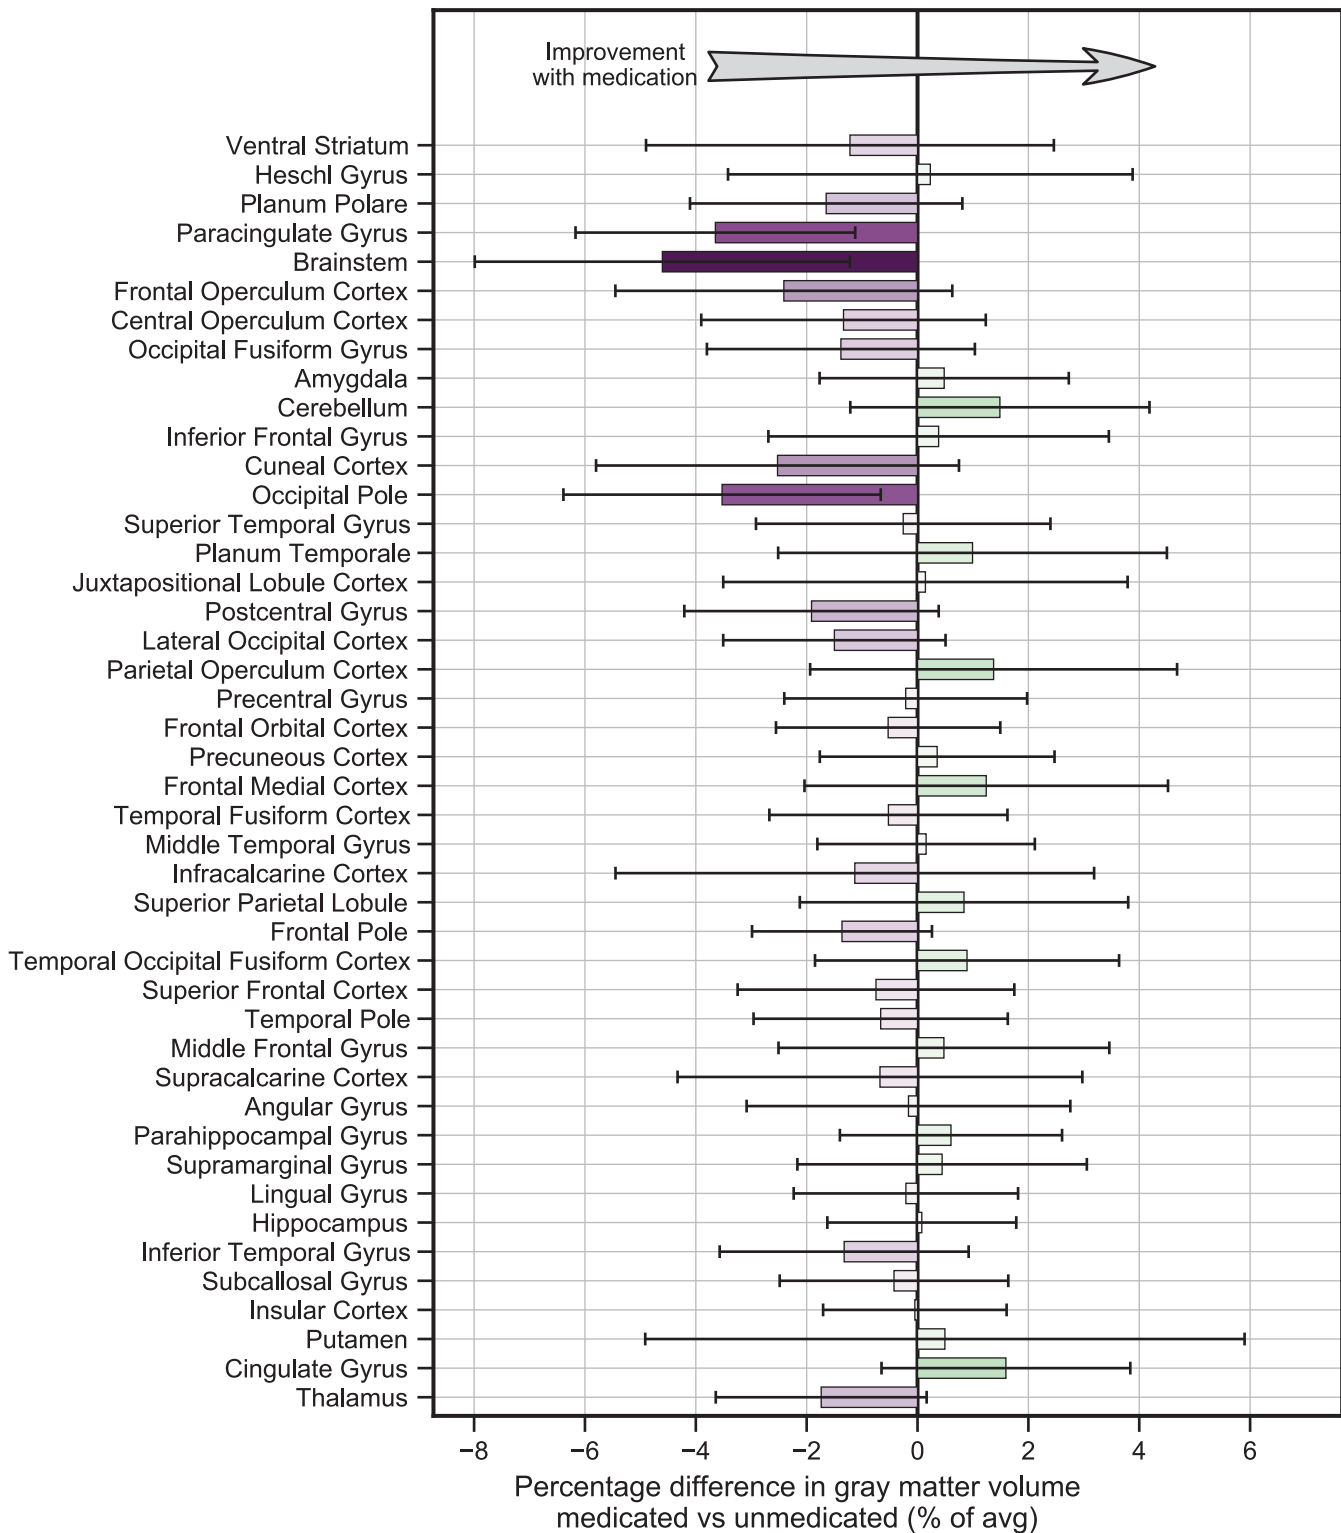

Supplement: supp [file elife-73138-supp-v1.zip]
