# Supplementary material for: Type 2 diabetes mellitus accelerates brain aging and cognitive decline: Complementary findings from UK Biobank and meta-analyses
Source: eLife journal article supplement (doi:10.7554/elife.73138), 2022-04-28

# Correlation Based Similarities between Brain Activation (ALFF) Effects Associated with Age and T2DM, Quantified Separately for Sexes

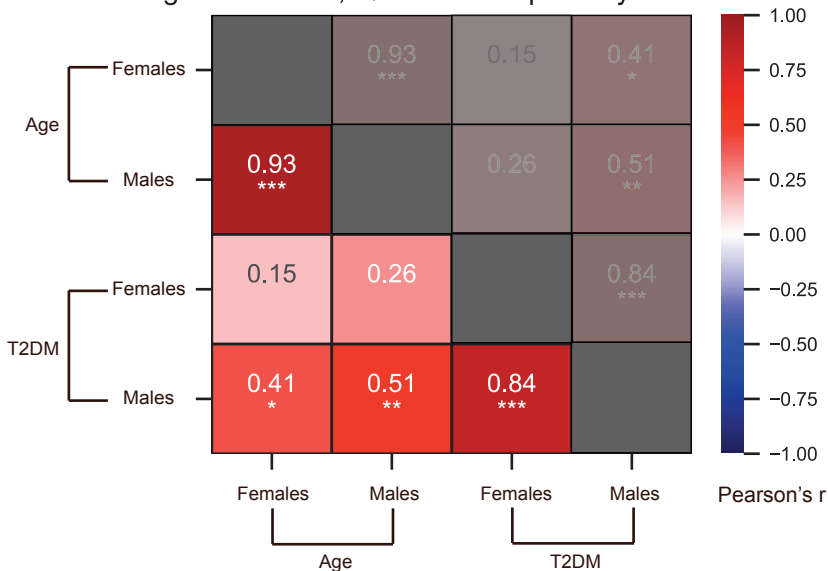

Supplement: supp [file elife-73138-supp-v1.zip]
