# Supplementary material for: Type 2 diabetes mellitus accelerates brain aging and cognitive decline: Complementary findings from UK Biobank and meta-analyses
Source: eLife journal article supplement (doi:10.7554/elife.73138), 2022-04-28
Supplement: supp [file elife-73138-supp-v1.zip]

Archive with 25 entries (25 files):
- elife_poa_e73138_Source_code_1.txt
- elife_poa_e73138_Transparent_Reporting_File.docx
- elife_poa_e73138_Supplementary_file_1.docx
- elife_poa_e73138_Supplementary_file_2.docx
- elife_poa_e73138_Supplementary_file_3.docx
- elife_poa_e73138_Supplementary_file_4.docx
- elife_poa_e73138_Supplementary_file_5.docx
- elife_poa_e73138_Supplementary_file_6.docx
- elife_poa_e73138_Figure_1_figure_supplement_1.pdf
- elife_poa_e73138_Figure_1_figure_supplement_2.pdf
- elife_poa_e73138_Figure_1_figure_supplement_3.pdf
- elife_poa_e73138_Figure_2_figure_supplement_1.pdf
- elife_poa_e73138_Figure_2_figure_supplement_2.pdf
- elife_poa_e73138_Figure_2_figure_supplement_3.pdf
- elife_poa_e73138_Figure_2_figure_supplement_4.pdf
- elife_poa_e73138_Figure_2_figure_supplement_5.pdf
- elife_poa_e73138_Figure_2_figure_supplement_6.pdf
- elife_poa_e73138_Figure_2_figure_supplement_7.pdf
- elife_poa_e73138_Figure_2_figure_supplement_8.pdf
- elife_poa_e73138_Figure_3_figure_supplement_1.pdf
- elife_poa_e73138_Figure_3_figure_supplement_2.pdf
- elife_poa_e73138_Figure_3_figure_supplement_3.pdf
- elife_poa_e73138_Figure_3_figure_supplement_4.pdf
- elife_poa_e73138_Figure_3_figure_supplement_5.pdf
- elife_poa_e73138_Figure_3_figure_supplement_6.pdf
