# Supplementary material for: Type 2 diabetes mellitus accelerates brain aging and cognitive decline: Complementary findings from UK Biobank and meta-analyses
Source: eLife journal article supplement (doi:10.7554/elife.73138), 2022-04-28

# Region Specific Gray Matter Volume Differences Associated with Sex, HC only ( $N_{Male}=6,466$ , $N_{Female}=6,466$ ), UK Biobank Dataset

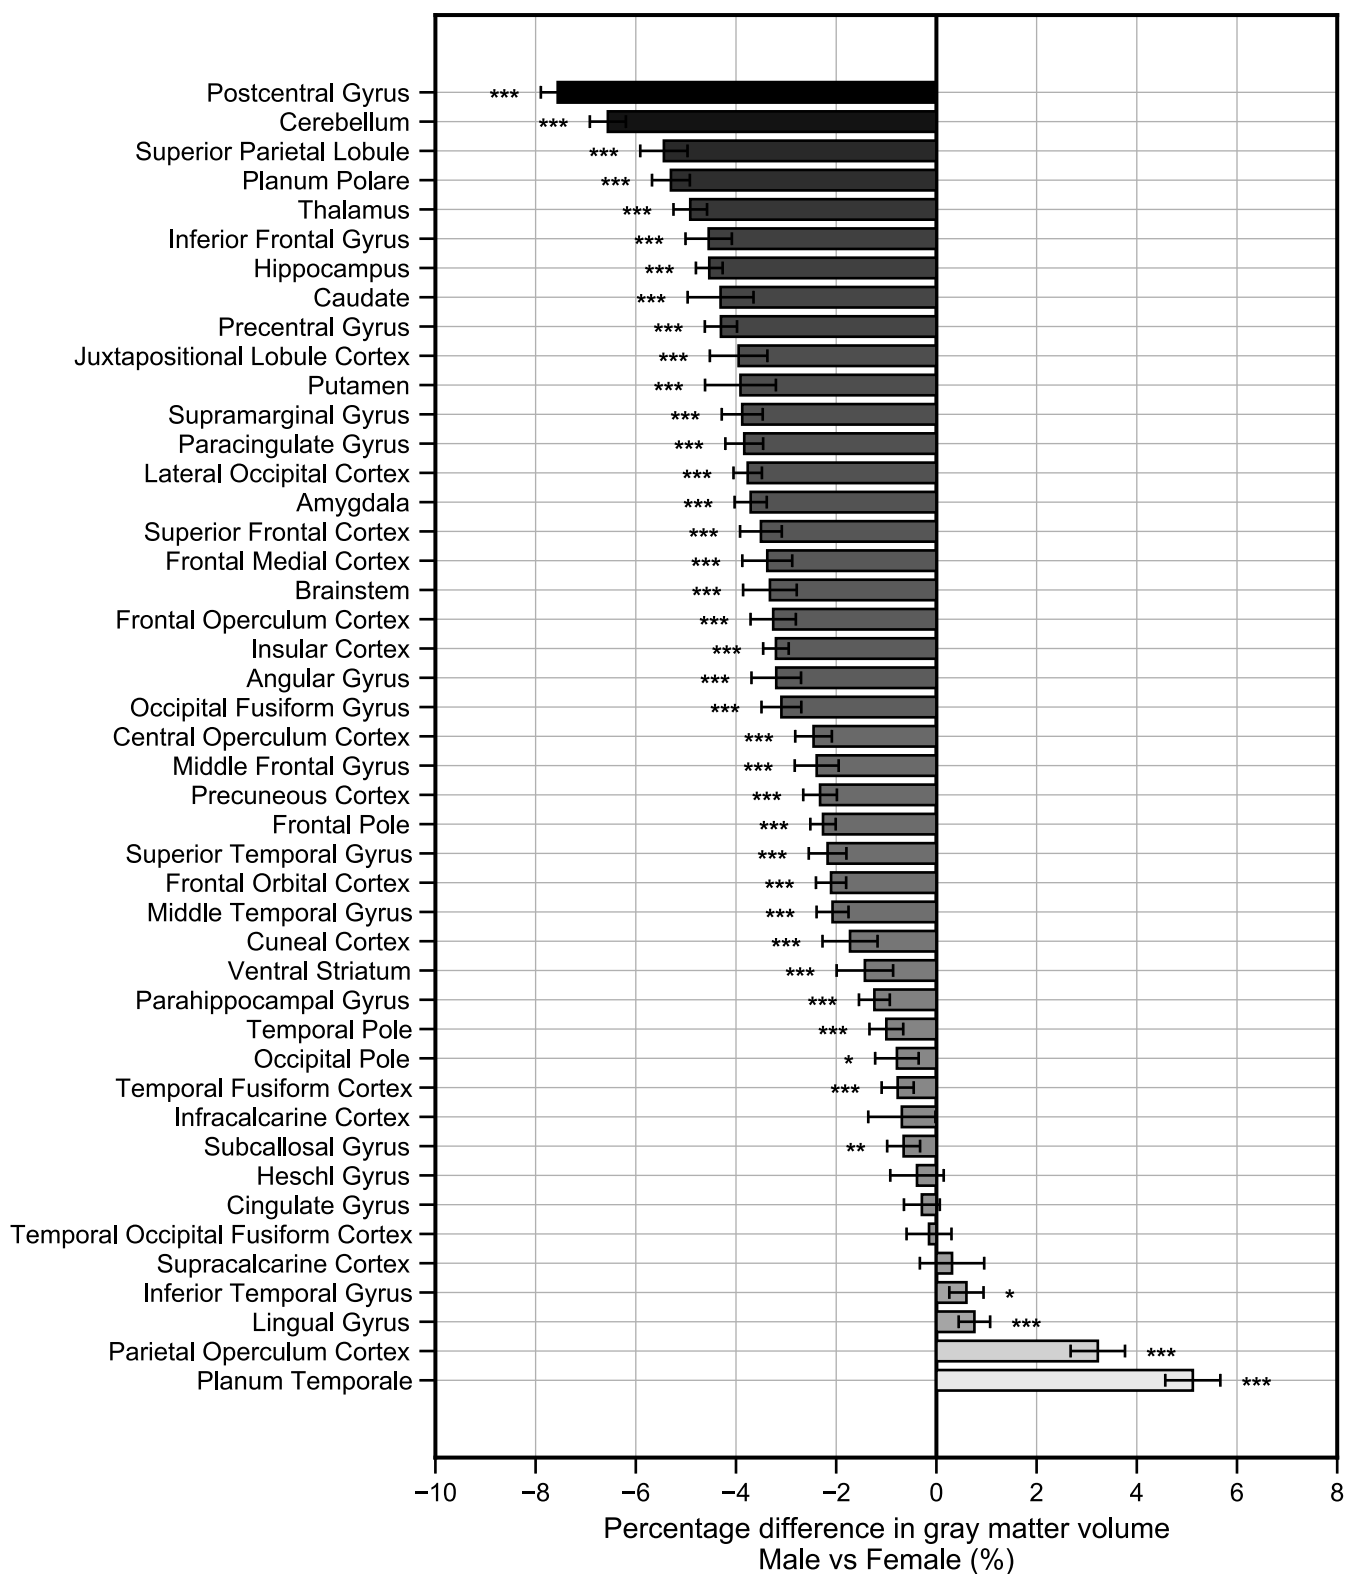

Supplement: supp [file elife-73138-supp-v1.zip]
