# Supplementary material for: Type 2 diabetes mellitus accelerates brain aging and cognitive decline: Complementary findings from UK Biobank and meta-analyses
Source: eLife journal article supplement (doi:10.7554/elife.73138), 2022-04-28

# Brain Activation (ALFF) Reorganization Trends across Age and T2DM Status, UK Biobank Dataset

## Caudate R

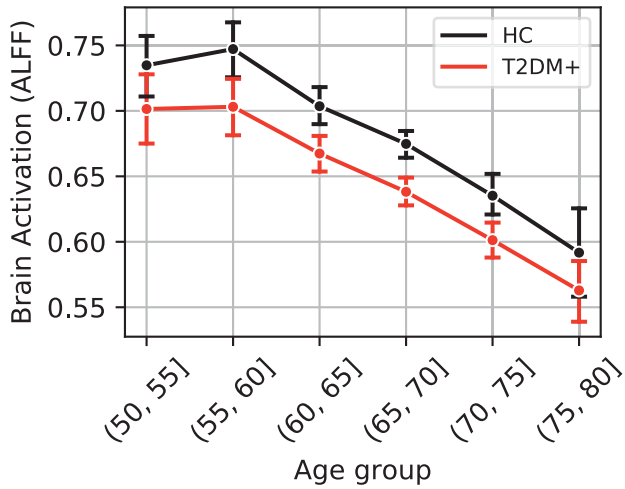

## Subgenual Area R

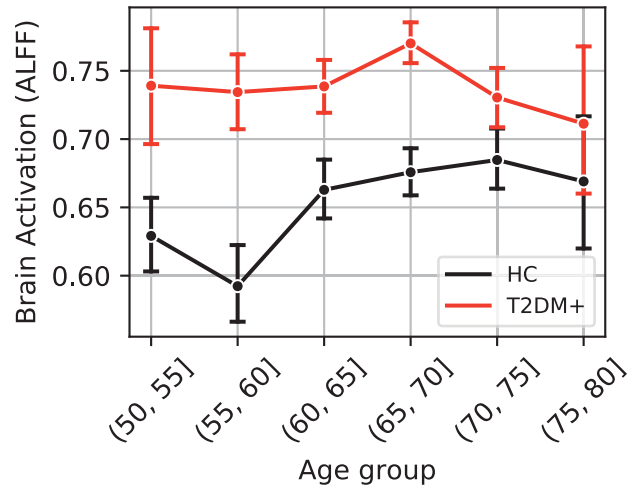

## Brainstem

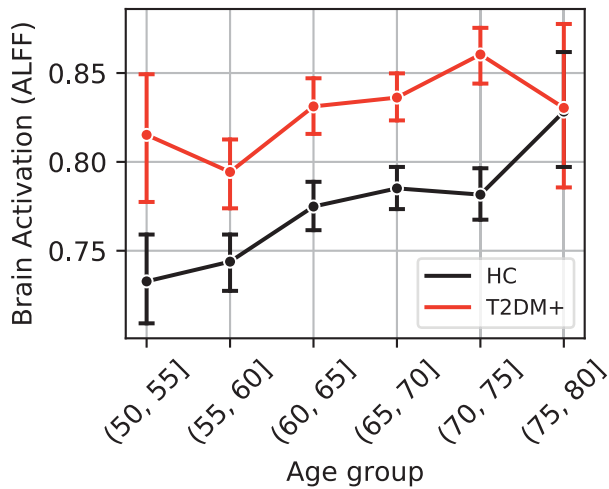

## Posterior Cingulate Gyrus L

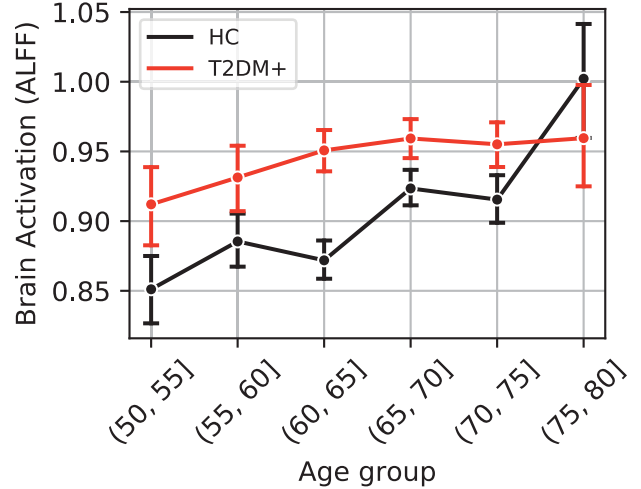

## Premotor Cortex L

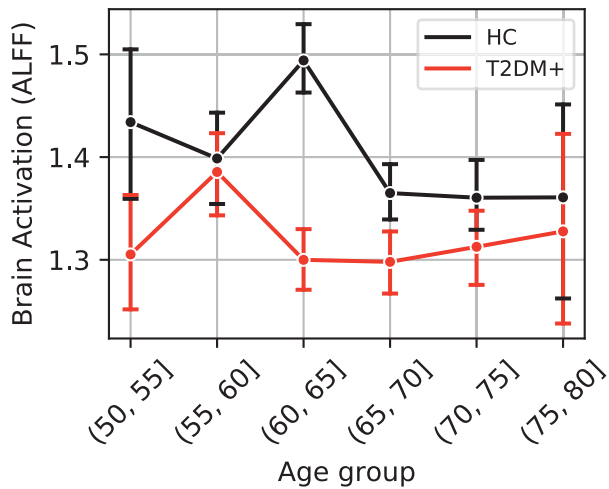

## Orbitofrontal Cortex R

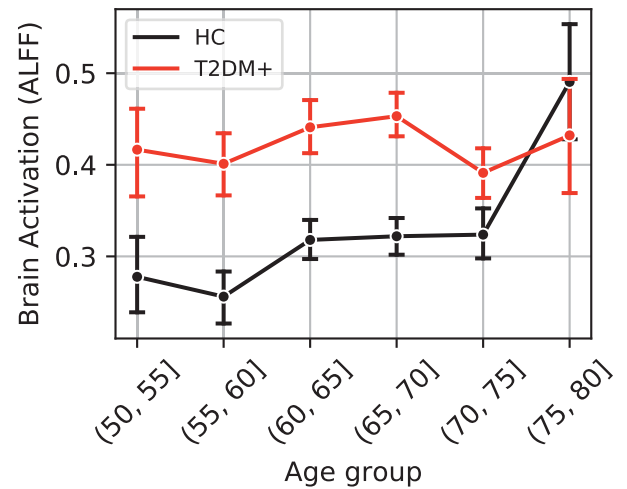

Supplement: supp [file elife-73138-supp-v1.zip › elife_poa_e73138_Figure_3_figure_supplement_3.pdf]
