# Supplementary material for: Type 2 diabetes mellitus accelerates brain aging and cognitive decline: Complementary findings from UK Biobank and meta-analyses
Source: eLife journal article supplement (doi:10.7554/elife.73138), 2022-04-28
Supplement: supp [file elife-73138-supp-v1.zip › elife_poa_e73138_Source_code_1.txt]

Source code for all analyses can be found at https://github.com/lcneuro/UKB_meta.
