# Supplementary figures and images for: Type 2 diabetes mellitus accelerates brain aging and cognitive decline: Complementary findings from UK Biobank and meta-analyses
Source: eLife journal article supplement (doi:10.7554/elife.73138), 2022-04-28

# Correlation Based Similarities among Effects and Datasets

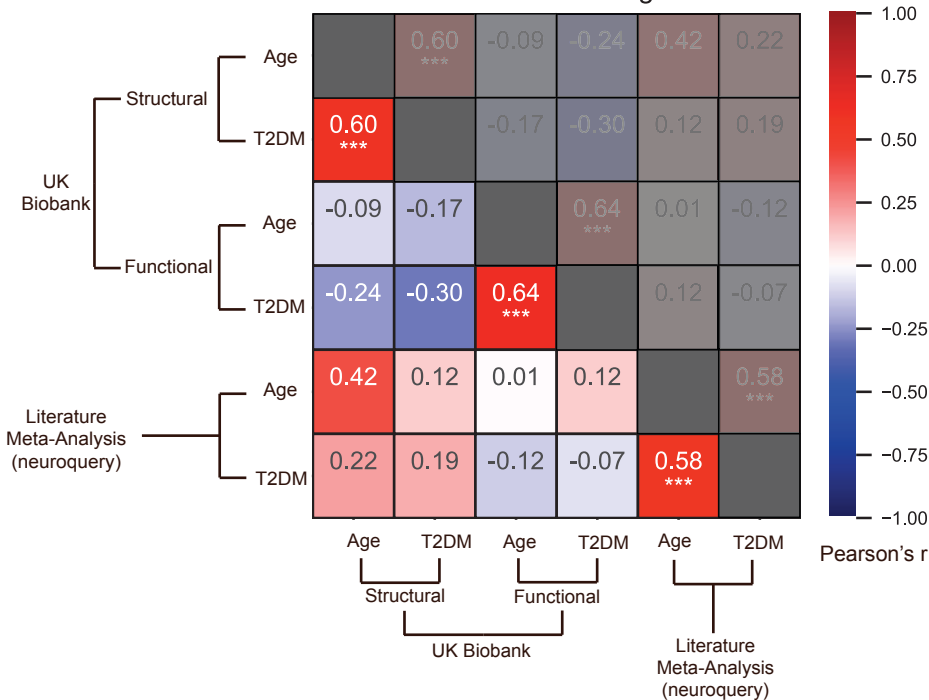

Supplement: supp [file elife-73138-supp-v1.zip]

Gray Matter Volume vs Age, T2DM Status and Sex  
N=203 (Per Group, Exact Matched)

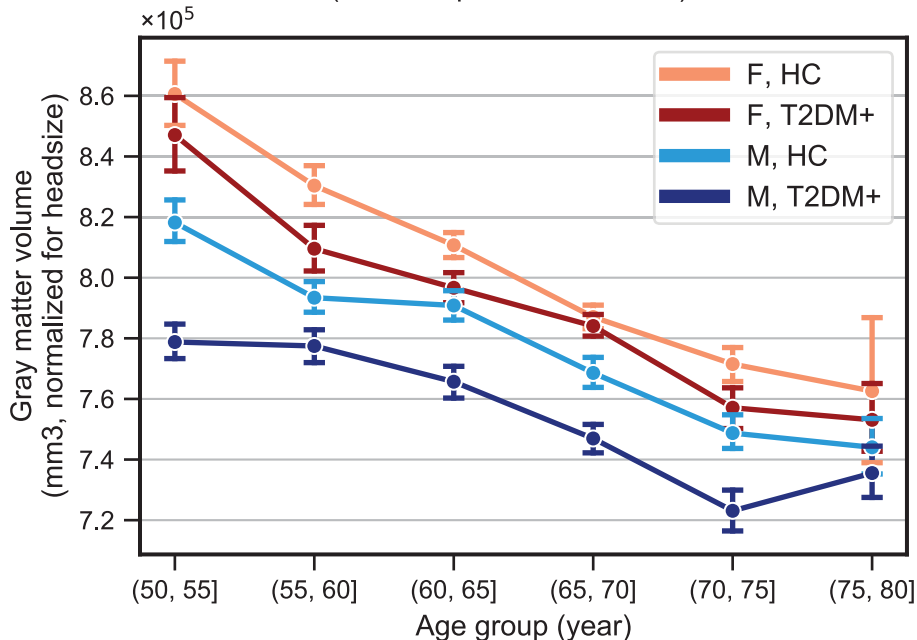

Supplement: supp [file elife-73138-supp-v1.zip]

# Domain Specific Cognitive Differences Associated with Sex HC only, UK Biobank Dataset

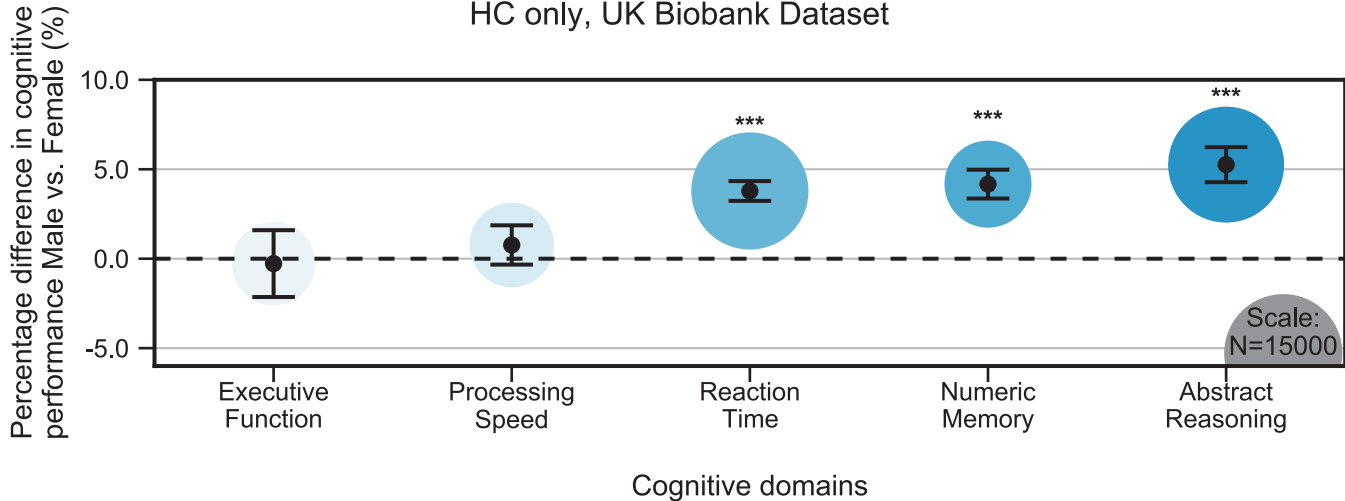

Supplement: supp [file elife-73138-supp-v1.zip › elife_poa_e73138_Figure_1_figure_supplement_1.pdf]

# Domain Specific Cognitive Performance

## Medicated (T2DM+, metformin only) vs. Unmedicated (T2DM+)

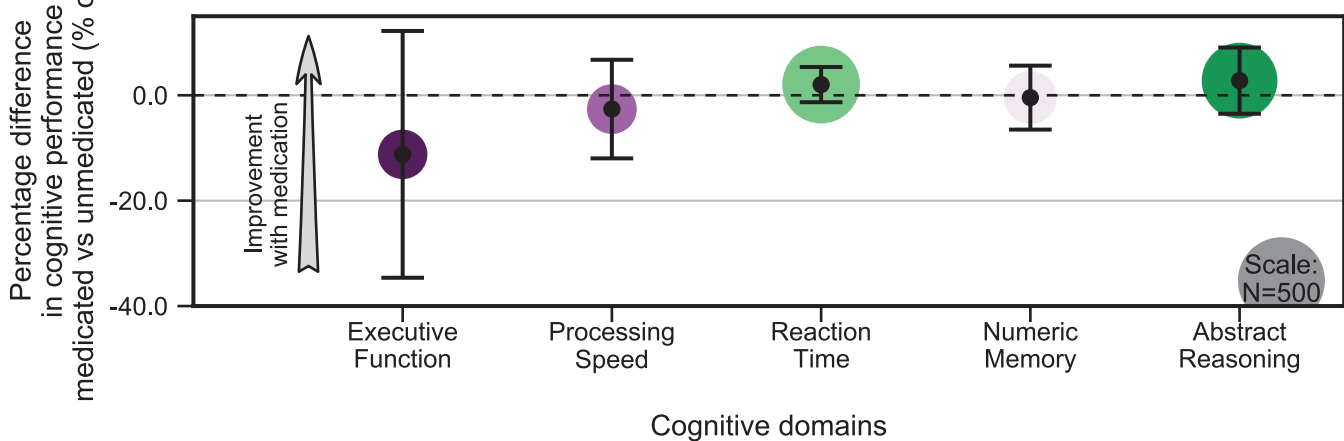

Supplement: supp [file elife-73138-supp-v1.zip › elife_poa_e73138_Figure_1_figure_supplement_3.pdf]

# Correlation Based Similarities among Effects and Datasets



Supplement: supp [file elife-73138-supp-v1.zip › elife_poa_e73138_Figure_3_figure_supplement_1.pdf]

# Correlation Based Similarities among Effects and Datasets

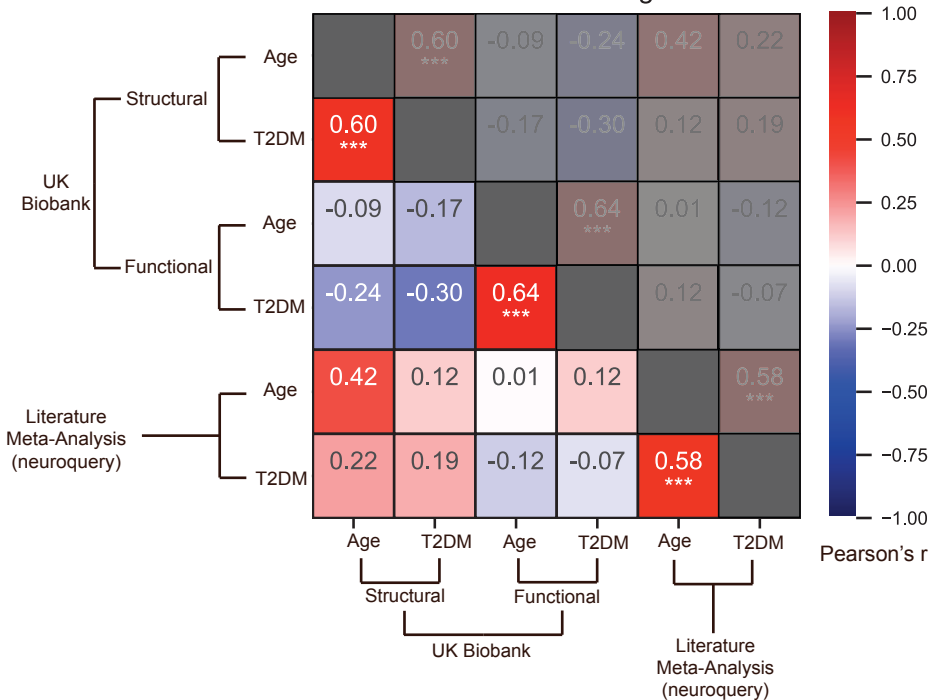

Supplement: supp [file elife-73138-supp-v1.zip › elife_poa_e73138_Figure_3_figure_supplement_4.pdf]
